# Supplementary material for: Approaching the size limit of organometallic layers: synthesis and characterization of highly ordered silver–thiolate lamellae with ultra-short chain lengths
Source: Royal Society of Chemistry journal article supplement (doi:10.1039/c6dt03629e), 2016-01-01
Supplement: c6dt03629e1.pdf [file c6dt03629e1.pdf]

## Supporting Information

### For *Dalton Transactions*

## Approaching the Size Limit of Organometallic Layers: Synthesis and Characterization of Highly Ordered Silver-Thiolate Lamellae with Ultra-short Chain Lengths

Zichao Ye,<sup>a,b</sup> Lito P. de la Rama,<sup>a,b</sup> Mikhail Y. Efremov,<sup>c</sup> Jian-Min Zuo,<sup>a</sup> and Leslie H. Allen<sup>\*a,b</sup>

<sup>a</sup> Department of Materials Science and Engineering, Frederick-Seitz Materials Research Laboratory, University of Illinois at Urbana-Champaign, Urbana, Illinois 61801, United States

<sup>b</sup> Coordinated Science Laboratory, University of Illinois at Urbana-Champaign, Urbana, Illinois 61801, United States

<sup>c</sup> College of Engineering, University of Wisconsin-Madison, Madison, Wisconsin 53706, United States

\* Leslie H. Allen ([l-allen9@illinois.edu](mailto:l-allen9@illinois.edu))

### Elemental analysis of thiolate composition

Table SI-I. Mass fractions of each element in AgSCn (n=1-16)

|        | Ag%      |            | S%       |            | C%       |            | H%       |            |
|--------|----------|------------|----------|------------|----------|------------|----------|------------|
|        | Measured | Calculated | Measured | Calculated | Measured | Calculated | Measured | Calculated |
| AgSC1  | 68.22    | 69.61      | 21.09    | 20.69      | 7.39     | 7.75       | 1.76     | 1.95       |
| AgSC2  | 62.78    | 63.83      | 18.27    | 18.97      | 14.17    | 14.21      | 2.89     | 2.98       |
| AgSC3  | 59.88    | 58.94      | 17.94    | 17.52      | 19.58    | 19.69      | 3.73     | 3.85       |
| AgSC4  | 53.94    | 54.74      | 17.57    | 16.27      | 24.28    | 24.38      | 4.45     | 4.60       |
| AgSC5  | 48.92    | 51.10      | 15.51    | 15.19      | 28.23    | 28.45      | 5.22     | 5.25       |
| AgSC6  | 46.69    | 47.92      | 13.82    | 14.24      | 31.72    | 32.01      | 5.65     | 5.82       |
| AgSC7  | 43.78    | 45.11      | 13.59    | 13.41      | 34.90    | 35.16      | 6.33     | 6.32       |
| AgSC8  | 43.83    | 42.61      | 12.50    | 12.67      | 37.81    | 37.96      | 6.70     | 6.77       |
| AgSC9  | 37.69    | 40.37      | 11.05    | 12.00      | 40.33    | 40.46      | 7.31     | 7.17       |
| AgSC10 | 39.72    | 38.36      | 11.29    | 11.40      | 42.50    | 42.71      | 7.43     | 7.53       |
| AgSC11 | 35.94    | 36.54      | 11.31    | 10.86      | 44.38    | 44.75      | 7.77     | 7.85       |
| AgSC12 | 34.34    | 34.88      | 10.19    | 10.37      | 46.47    | 46.60      | 8.15     | 8.15       |
| AgSC14 | 33.63    | 31.98      | 10.26    | 9.51       | 49.65    | 49.85      | 8.70     | 8.67       |
| AgSC15 | 30.57    | 30.70      | 9.49     | 9.13       | 51.05    | 51.28      | 8.93     | 8.89       |
| AgSC16 | 28.81    | 29.52      | 8.71     | 8.78       | 52.39    | 52.60      | 9.13     | 9.10       |

\*The measured percentages are compared with the theoretical percentages calculated from molecular weight.

### Morphology of AgSCn (n=8-16): SEM imaging

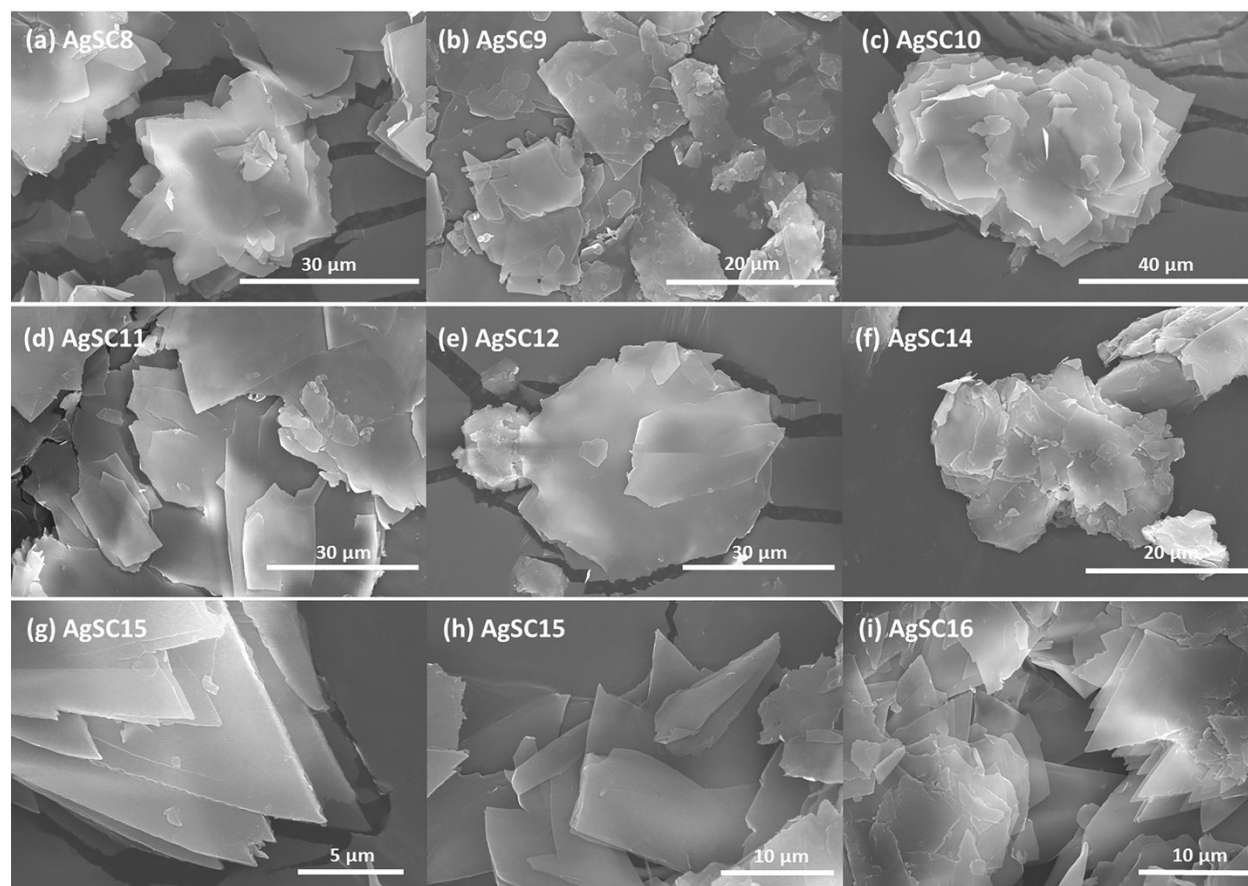

Figure SI-1. SEM images of AgSCn (n=8-16) crystals: all samples show well-defined nanosheet-shaped lamellar morphology.

## XRD patterns of as-synthesized vs. recrystallized or Ostwald ripened AgSCn

Table SI-II. comparison of XRD (0k0) diffractions between the as-synthesized and recrystallized (AgSC7) or Ostwald ripened (AgSC3) crystals, in terms of peak FWHM, peak integrated intensity and number of peaks.

|                    | AgSC7       |                | AgSC3       |                 |
|--------------------|-------------|----------------|-------------|-----------------|
|                    | Synthesized | Recrystallized | Synthesized | Ostwald Ripened |
| Sample Mass (mg)   | 11.7        | 7.0            | 22.0        | 13.9            |
| FWHM               | 0.21°       | 0.19°          | 0.21°       | 0.16°           |
| Normalized I(010)* | 1.0         | 17.9           | 1.0         | 1.6             |
| # of Peaks         | 5           | 14             | 3           | 6               |

\*The normalized integrated intensity of I(010) peak for as-synthesized samples are set to be 1.0.

XRD patterns of AgSCn (n=6-16)

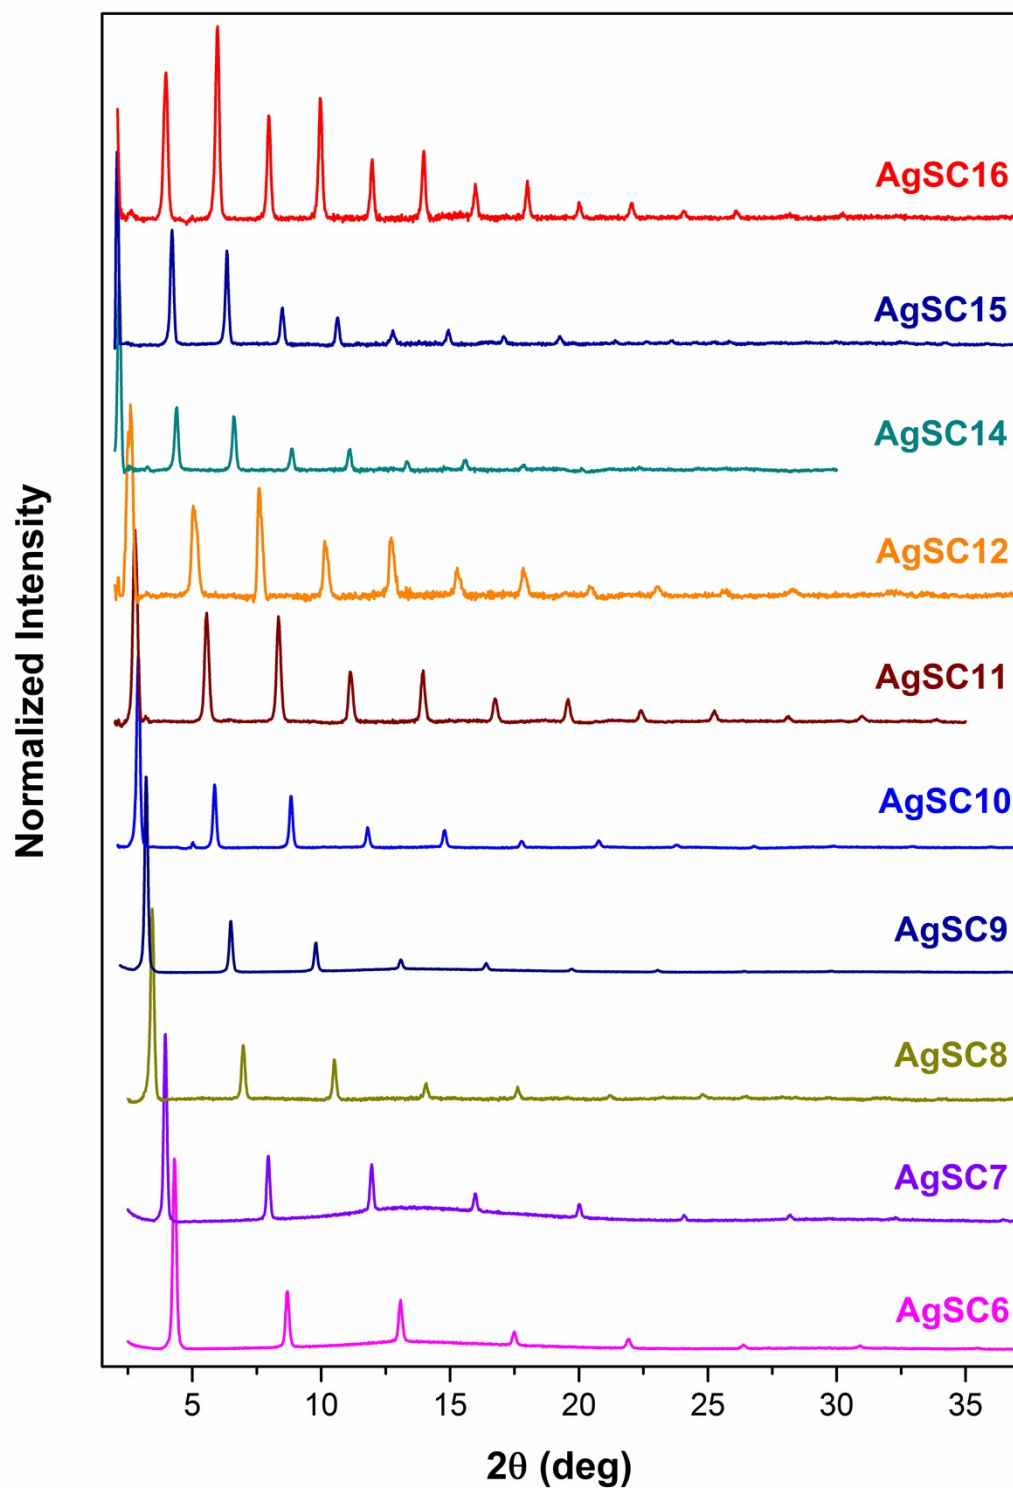

Figure SI-2. Plot shows the raw data of XRD (0k0) lamellar reflections for AgSCn (n=6-16) crystals.

XRD measurement on the residues of decomposed AgSC3

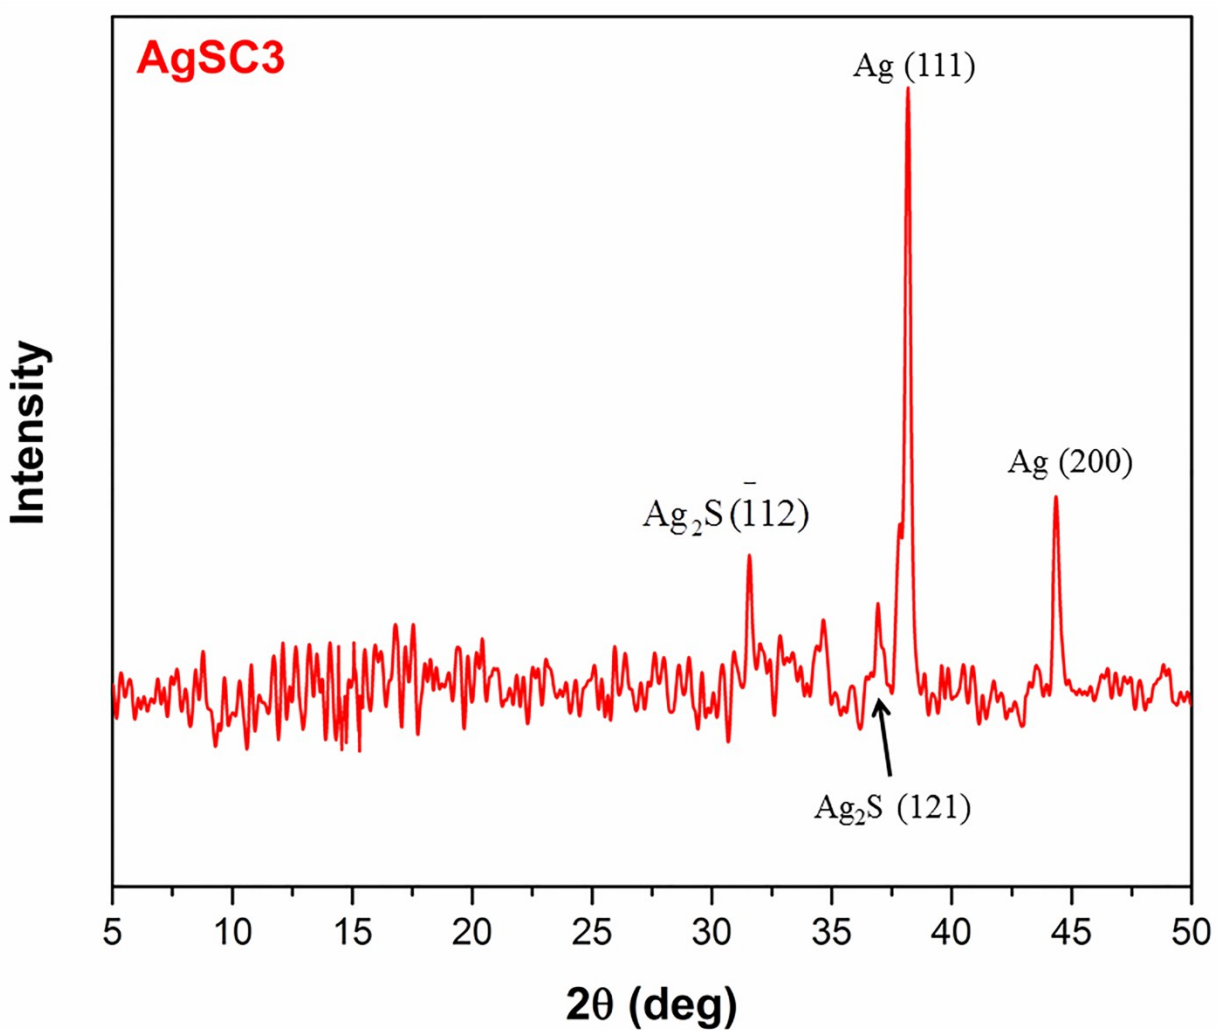

Figure SI-3. XRD pattern of residue materials after the decomposition of AgSC3. Reflection peaks of Ag (111), Ag (200), Ag<sub>2</sub>S ( $\bar{1}12$ ) and Ag<sub>2</sub>S (121) are observed.

## DSC traces of Ag<sub>2</sub>S

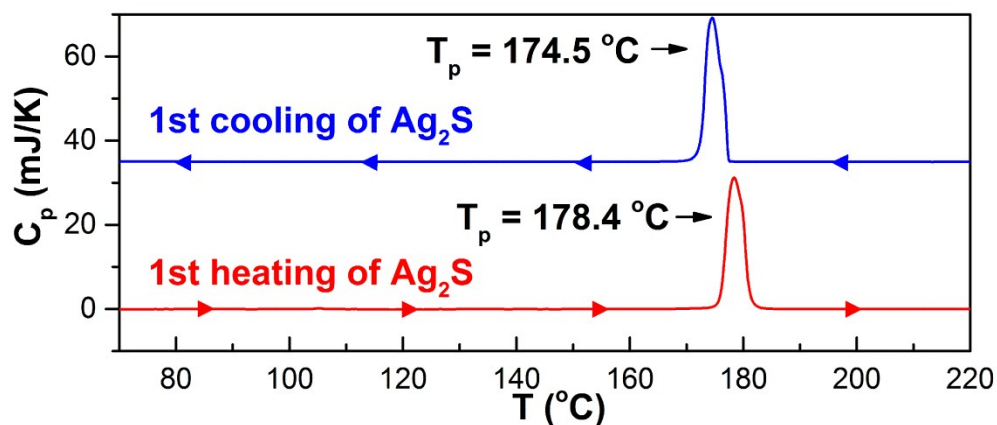

Figure SI-4. DSC traces of commercial Ag<sub>2</sub>S with 10 °C/min scanning rate.

## Vibration modes of hydrocarbon groups (FTIR analysis)

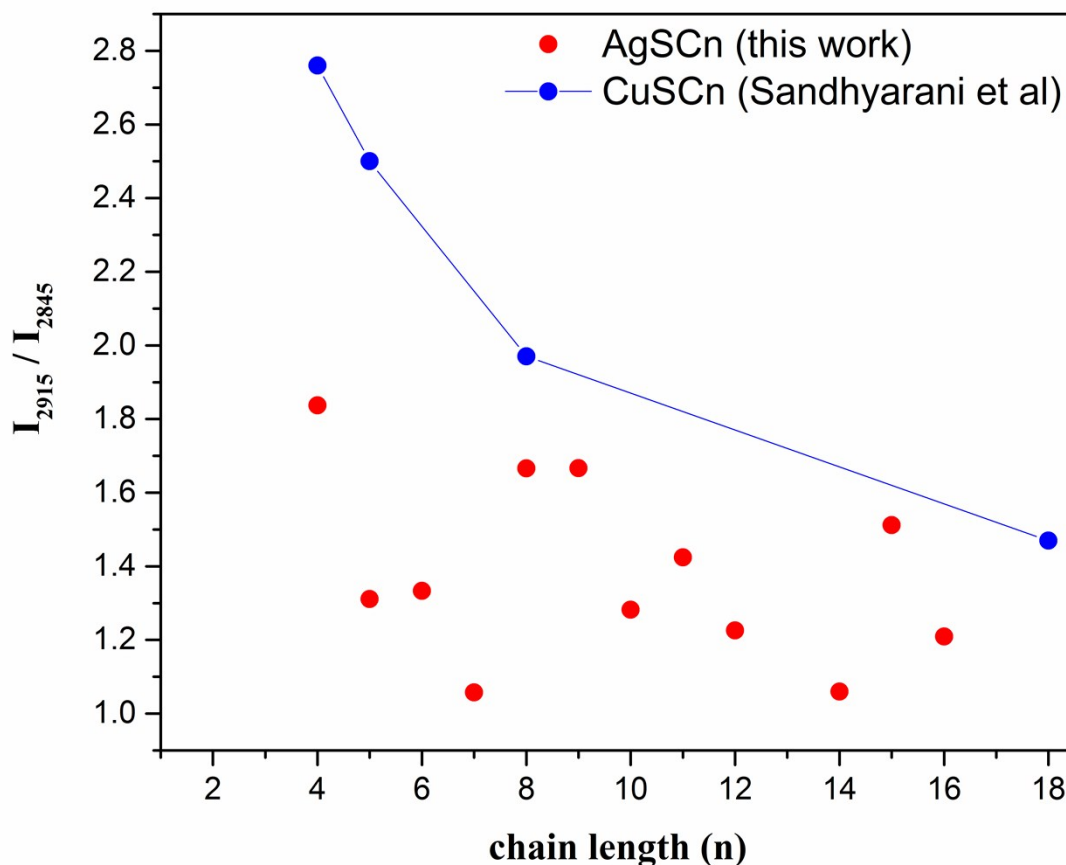

Figure SI-5. Plot shows the area intensity ratio between  $d^-$  and  $d^+$  FTIR peaks for AgSCn ( $n=4-16$ ) and CuSCn ( $n=4, 5, 8, 18$ ). The data of CuSCn in this plot are replotted from the work of Sandhyarani et al.<sup>1</sup>

In Figure 7a (main text), two distinct peaks observed at 2860-2875  $\text{cm}^{-1}$  and 2950-2960  $\text{cm}^{-1}$  are assigned to the symmetric ( $r^+$ ) and asymmetric ( $r^-$ ) stretching modes of terminal CH<sub>3</sub> groups of AgSCn, respectively.<sup>1-4</sup> The intensity of these peaks relative to that of  $d^+$  and  $d^-$  modes reduces as chain length increases, due to the decreasing percentages of CH<sub>3</sub> groups. The  $r^+$  peaks are almost buried in the shoulder of  $d^+$  peaks for  $n>7$ . AgSC1 only shows one major signal at 2889  $\text{cm}^{-1}$ , which is suggested as the CH<sub>3</sub> symmetric stretching peak

(r<sup>+</sup>). A similar peak is observed for methanethiol absorbed on Ag surface at 2908 cm<sup>-1</sup>, which is 40 cm<sup>-1</sup> red-shifted from that of CH<sub>3</sub>SH.<sup>5</sup>

Table SI-III lists the peak locations of all C-H stretching modes for the AgSCn (n=1-16) studied in this work.

**Table SI-III. C-H stretching modes of AgSCn (n=1-16) (unit: cm<sup>-1</sup>)**

| n  | $\nu_s(\text{CH}_2), d^+$ | $\nu_{as}(\text{CH}_2), d^-$ | $\nu_s(\text{CH}_3), r^+$ | $\nu_{as}(\text{CH}_3), r^-$ |
|----|---------------------------|------------------------------|---------------------------|------------------------------|
| 1  | -                         | -                            | 2889                      | 2960                         |
| 2  | -                         | 2917                         | 2861                      | 2950                         |
| 3  | -                         | 2923                         | 2863                      | 2953                         |
| 4  | 2850                      | 2920                         | 2870                      | 2955                         |
| 5  | 2847                      | 2916                         | 2868                      | 2952                         |
| 6  | 2847                      | 2916                         | 2871                      | 2954                         |
| 7  | 2845                      | 2915                         | 2870                      | 2953                         |
| 8  | 2846                      | 2916                         | 2872                      | 2953                         |
| 9  | 2846                      | 2915                         | 2871                      | 2953                         |
| 10 | 2846                      | 2915                         | 2872                      | 2954                         |
| 11 | 2846                      | 2915                         | 2872                      | 2953                         |
| 12 | 2845                      | 2915                         | 2873                      | 2953                         |
| 14 | 2845                      | 2913                         | 2872                      | 2952                         |
| 15 | 2846                      | 2915                         | 2872                      | 2953                         |
| 16 | 2847                      | 2916                         | 2873                      | 2952                         |

# Degradation of AgSC15 lamellae under e-beam exposure

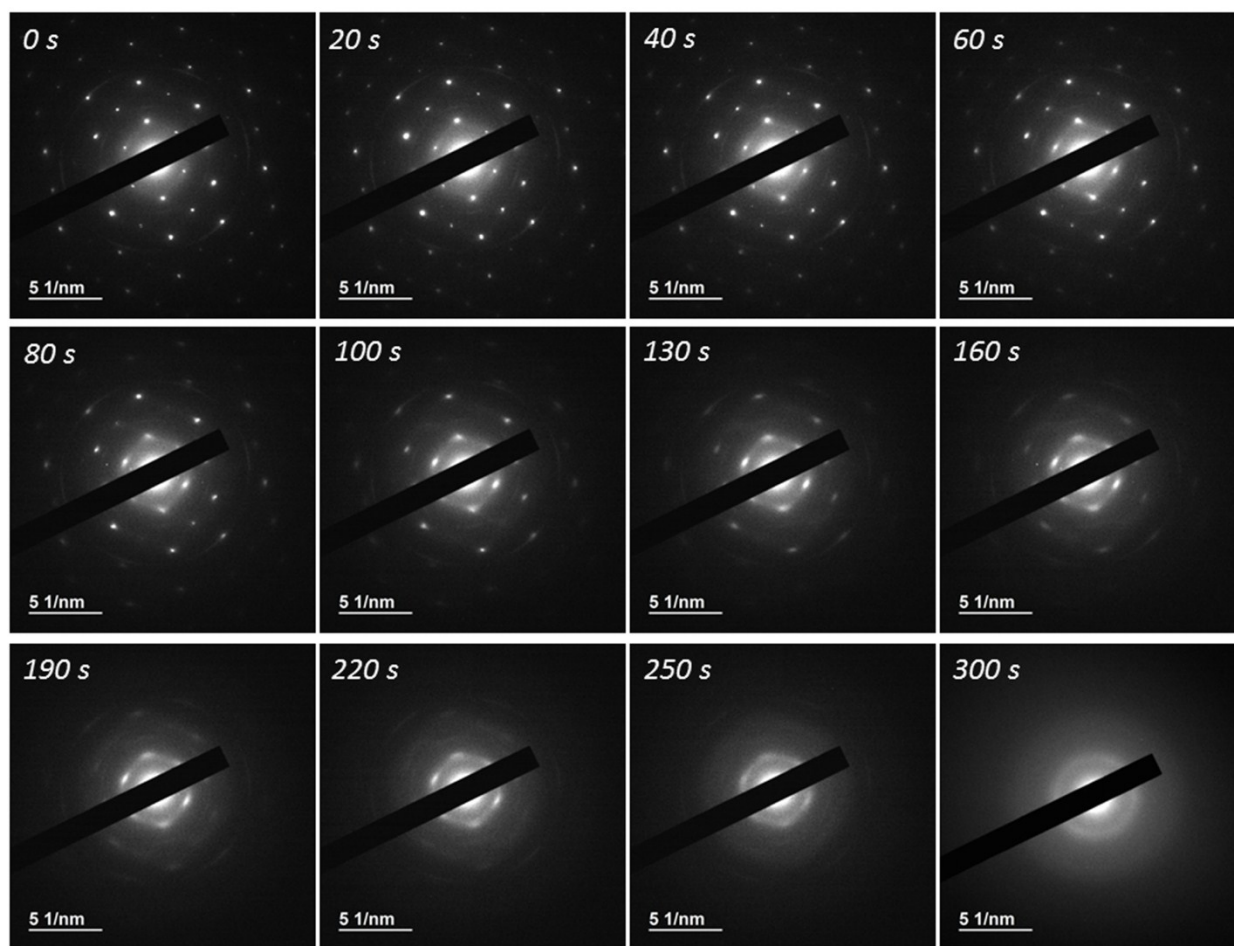

Figure SI-6. Images show the evolution of SAED patterns (zone axis: [010]) of AgSC15 lamellae under e-beam exposure. The well-defined single crystal degrades into amorphous within 5 min.



# Molecular structure and van der Waals gap of odd and even AgSCn

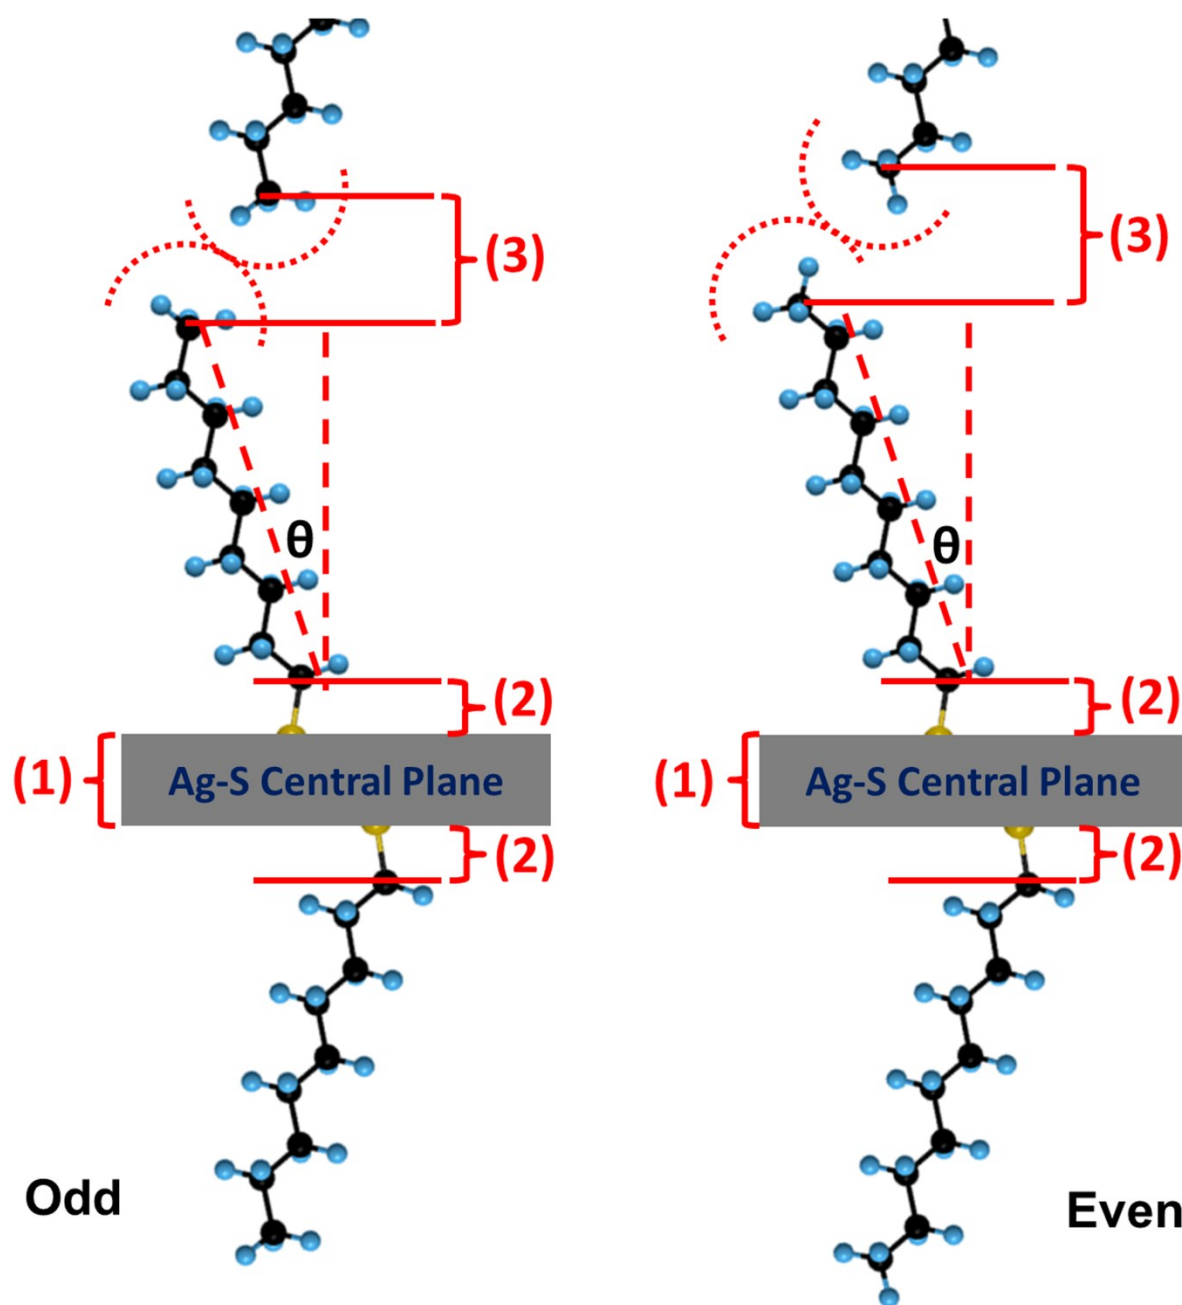

Figure SI-7. Schematics show the molecular structures of odd and even AgSCn. The intercepts of fittings in Figure 10a represent the sum of (1) Ag-S central plane thickness, (2) twice the projection of S-C bond length along [0k0] direction, and (3) the interlayer van der Waals gaps. The tilt angle of the chains is about 18°.

## References

1. N. Sandhyarani and T. Pradeep, *J. Mater. Chem.*, 2001, **11**, 1294-1299.
2. A. N. Parikh, S. D. Gillmor, J. D. Beers, K. M. Beardmore, R. W. Cutts and B. I. Swanson, *The Journal of Physical Chemistry B*, 1999, **103**, 2850-2861.
3. S.-H. Park and C. E. Lee, *Chem. Mater.*, 2006, **18**, 981-987.
4. P. N. Nelson and H. A. Ellis, *Dalton Trans.*, 2012, **41**, 2632-2638.
5. S. B. Lee, K. Kim, M. S. Kim, W. S. Oh and Y. S. Lee, *J. Mol. Struct.*, 1993, **296**, 5-13.
